# Supplementary material
Source: PubMed Central journal article supplement (PMC3081930)

## Labdane Diterpenoids from *Leonurus sibiricus*

Hankui Wu,<sup>†,‡</sup> Frank R. Fronczek,<sup>§</sup> Daneel Ferreira,<sup>†,||</sup> Charles L. Burandt Jr,<sup>⊥</sup> and Jordan K. Zjawiony<sup>\*,†,||</sup>

*Department of Pharmacognosy and Research Institute of Pharmaceutical Sciences, School of Pharmacy, National Center for Natural Products Research, University of Mississippi, University, MS 38677-1848, and College of Chemistry and Chemical Engineering, Anyang Normal University, Anyang 455002, People's Republic of China, and Department of Chemistry, Louisiana State University, Baton Rouge, LA 70803-1804*

\*To whom correspondence should be addressed. Tel: +1 662 915 7290. Fax: +1 662 915 6975.

E-mail address: [jordan@olemiss.edu](mailto:jordan@olemiss.edu)

<sup>†</sup> Department of Pharmacognosy, University of Mississippi.

<sup>‡</sup> Anyang Normal University.

<sup>§</sup> Louisiana State University.

<sup>⊥</sup> National Center for Natural Products Research, University of Mississippi.

<sup>||</sup> Research Institute of Pharmaceutical Sciences, University of Mississippi.

- S1.  $^1\text{H}$  NMR (400 MHz, acetone- $d_6$ ) spectrum of the new compound **1**
- S2.  $^{13}\text{C}$  NMR (100 MHz, acetone- $d_6$ ) spectrum of **1**
- S3. DEPT135 spectrum of **1**
- S4. HMQC spectrum of **1**
- S5. HMBC spectrum of **1**
- S6. NOESY spectrum of **1**
- S7.  $^1\text{H}$  NMR (400 MHz, acetone- $d_6$ ) spectrum of the new compound **2**
- S8.  $^{13}\text{C}$  NMR (100 MHz, acetone- $d_6$ ) spectrum of **2**
- S9. DEPT135 spectrum of **2**
- S10. HMQC spectrum of **2**
- S11. HMBC spectrum of **2**
- S12. NOESY spectrum of **2**
- S13.  $^1\text{H}$  NMR (400 MHz, acetone- $d_6$ ) spectrum of the new compound **3**
- S14.  $^{13}\text{C}$  NMR (100 MHz, acetone- $d_6$ ) spectrum of **3**
- S15. DEPT135 spectrum of **3**
- S16. HMQC spectrum of **3**
- S17. HMBC spectrum of **3**
- S18. NOESY spectrum of **3**
- S19.  $^1\text{H}$  NMR (400 MHz, acetone- $d_6$ ) spectrum of the new compound **4**
- S20.  $^{13}\text{C}$  NMR (100 MHz, acetone- $d_6$ ) spectrum of **4**
- S21. DEPT135 spectrum of **4**
- S22. HMQC spectrum of **4**
- S23. HMBC spectrum of **4**
- S24. NOESY spectrum of **4**
- S25.  $^1\text{H}$  NMR (400 MHz, DMSO- $d_6$ ) spectrum of the new compound **5/6**
- S26.  $^{13}\text{C}$  NMR (100 MHz, DMSO- $d_6$ ) spectrum of **5/6**
- S27. DEPT135 spectrum of **5/6**
- S28. HMQC spectrum of **5/6**
- S29. HMBC spectrum of **5/6**
- S30. NOESY spectrum of **5/6**

S1.  $^1\text{H}$  NMR (400 MHz, acetone- $d_6$ ) spectrum of the new compound **1**

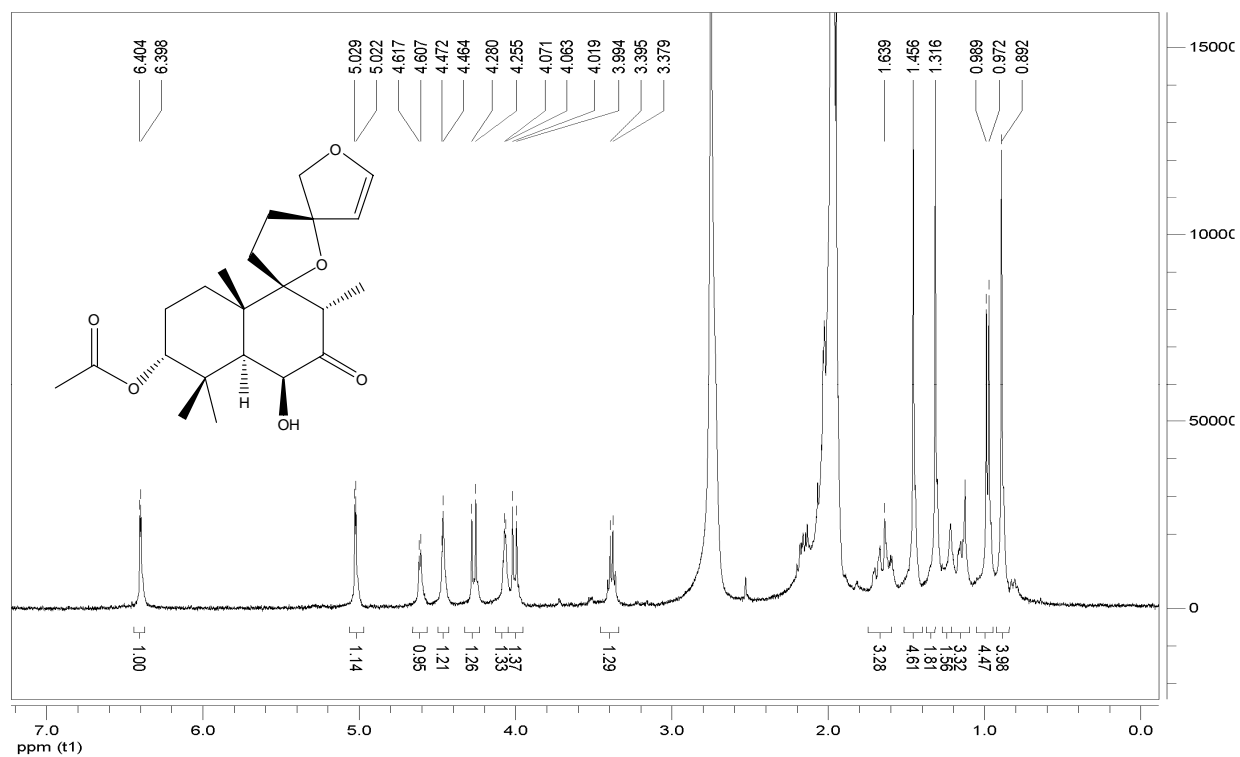

S2.  $^{13}\text{C}$  NMR (100 MHz, acetone- $d_6$ ) spectrum of the new compound **1**

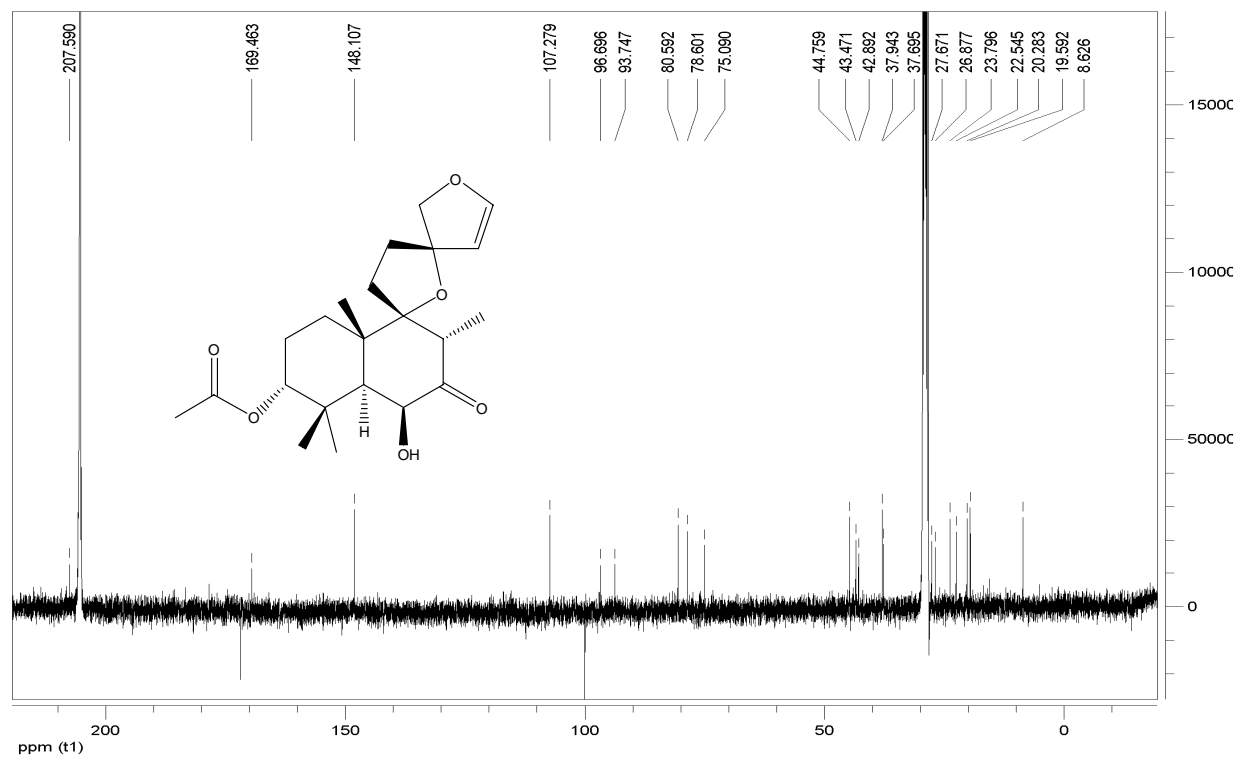

### S3. DEPT 135 spectrum of the new compound **1**

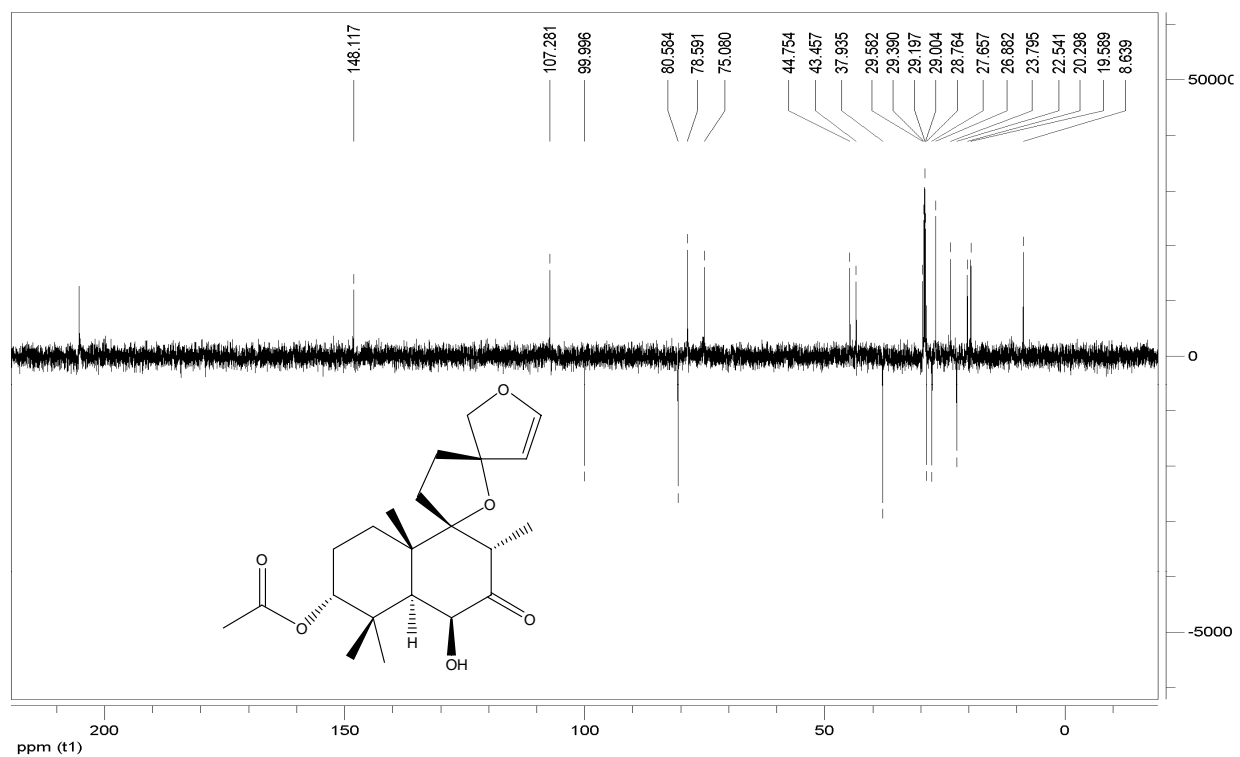

### S4. HMQC spectrum of the new compound **1**

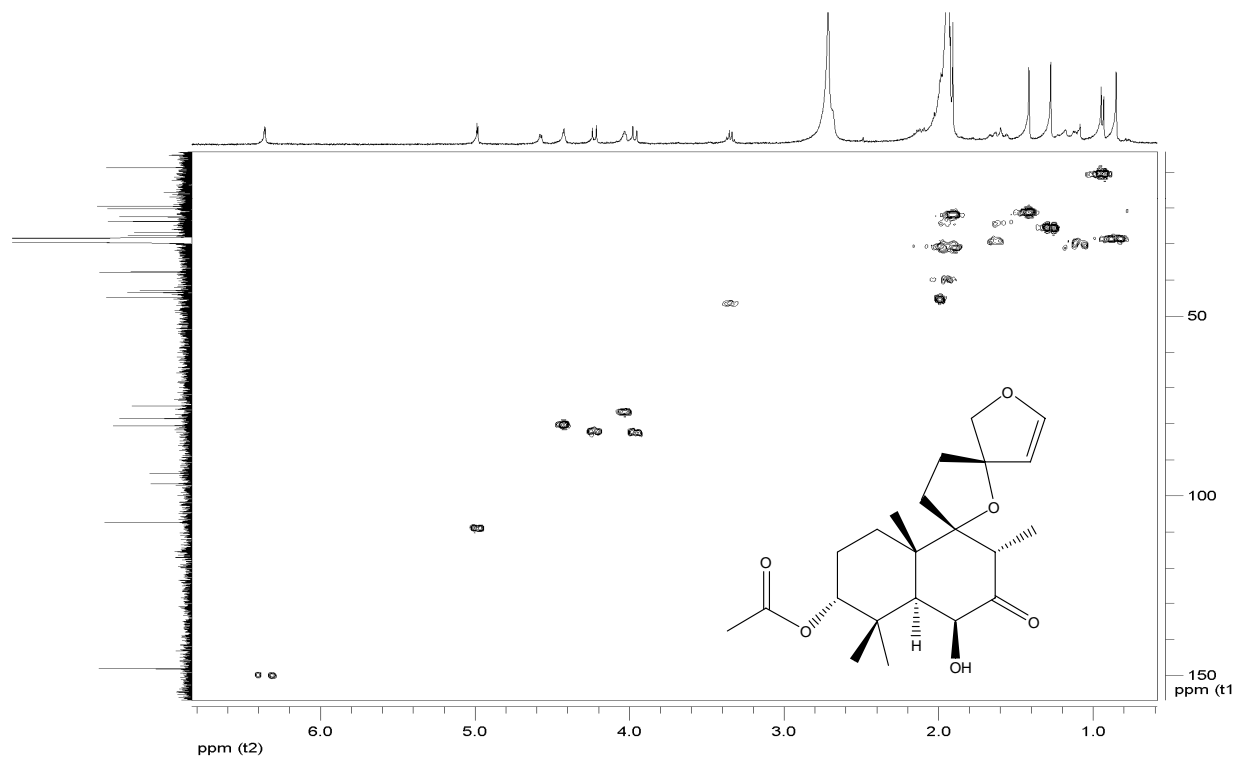

S5. HMBC spectrum of the new compound **1**

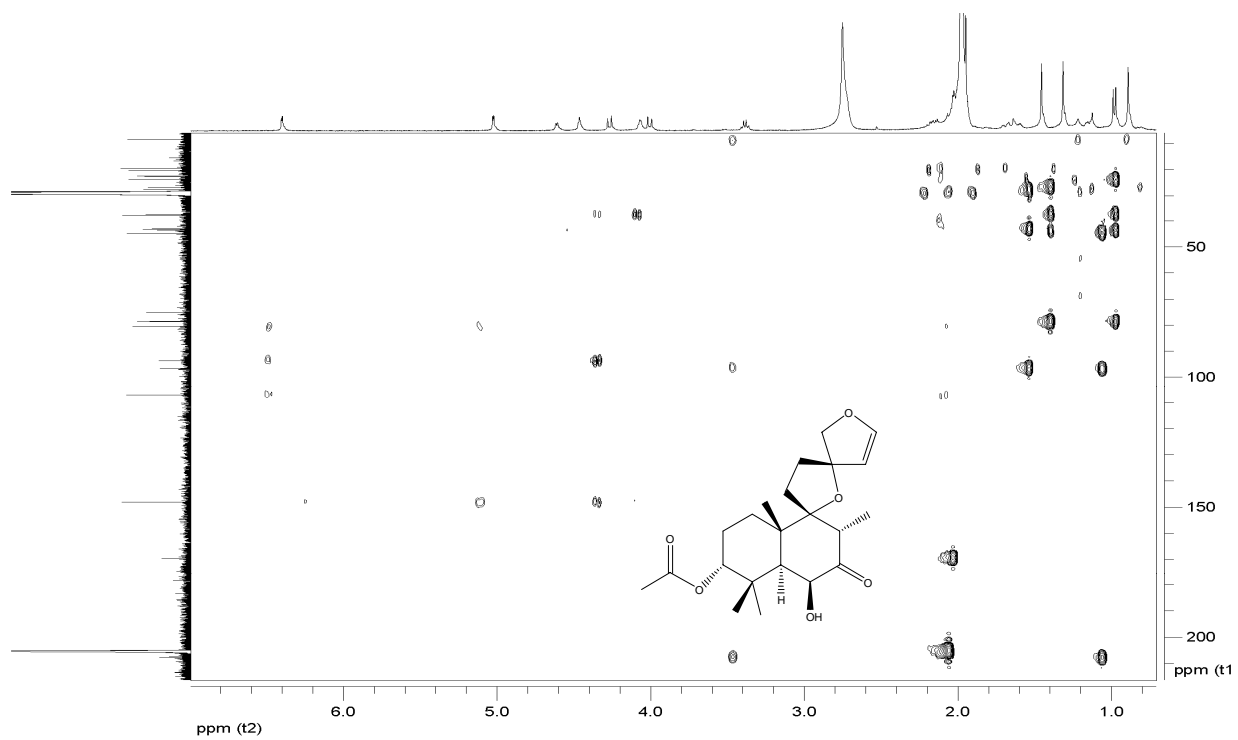

S6. NOESY spectrum of the new compound **1**

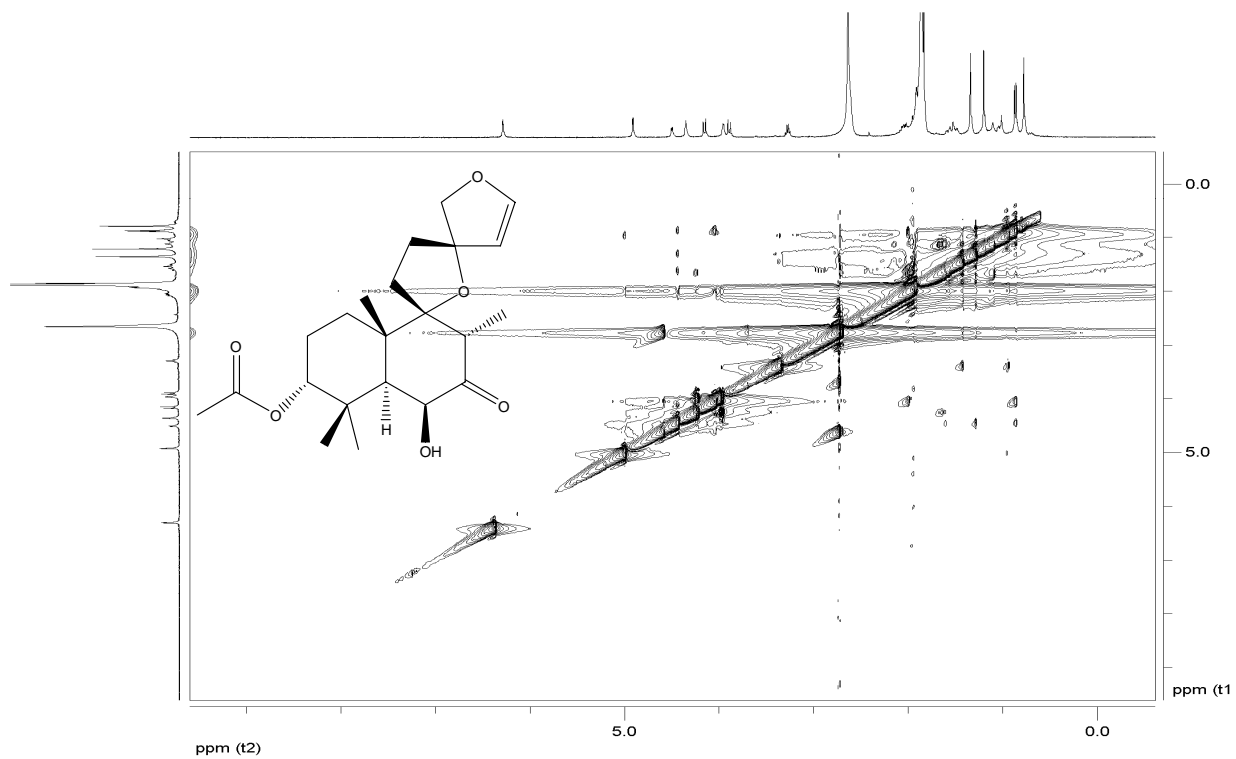

S7.  $^1\text{H}$  NMR (400 MHz, acetone- $d_6$ ) spectrum of the new compound **2**

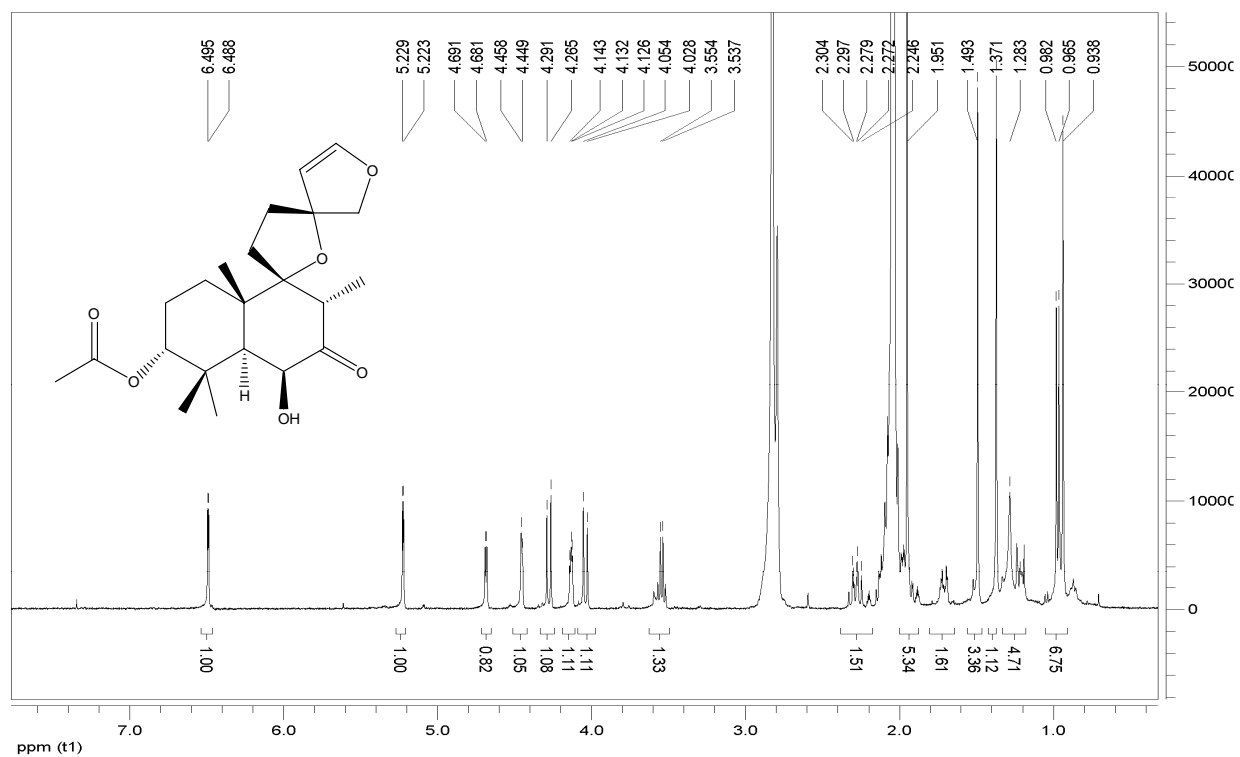

S8.  $^{13}\text{C}$  NMR (100 MHz, acetone- $d_6$ ) spectrum of the new compound **2**

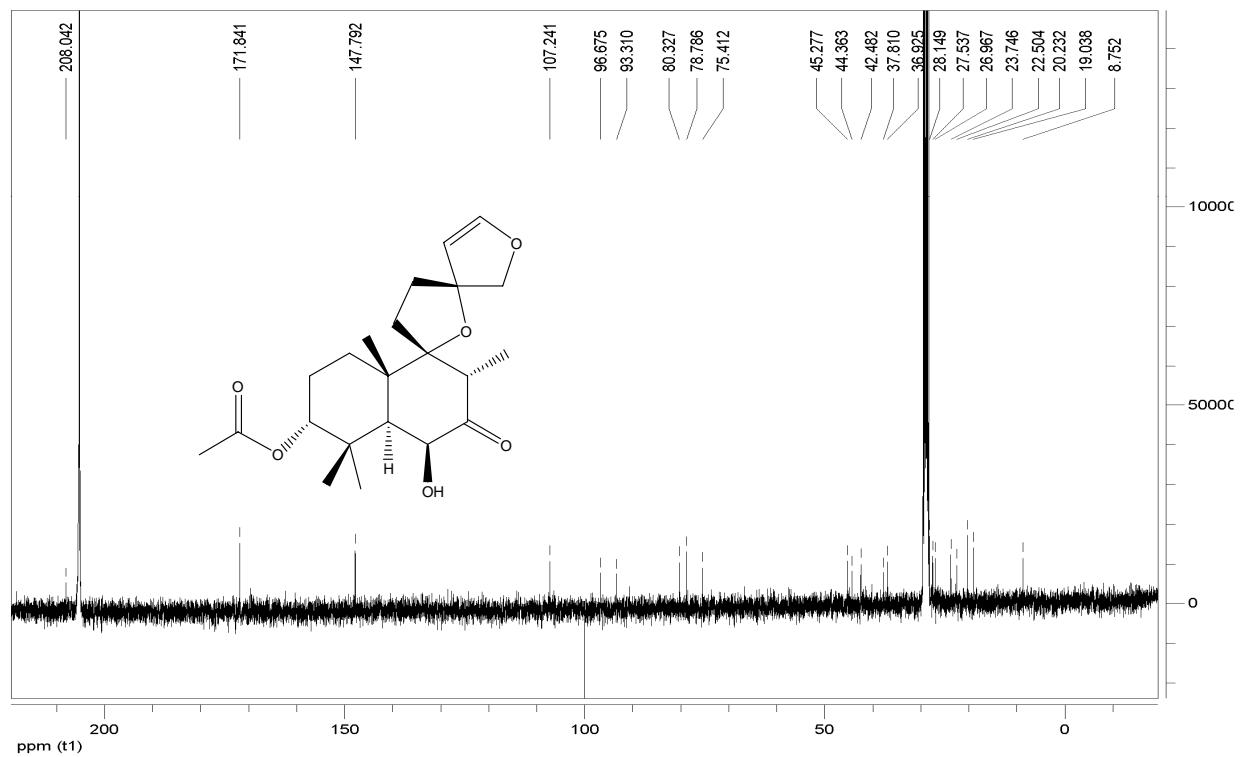

S9. DEPT 135 spectrum of the new compound **2**

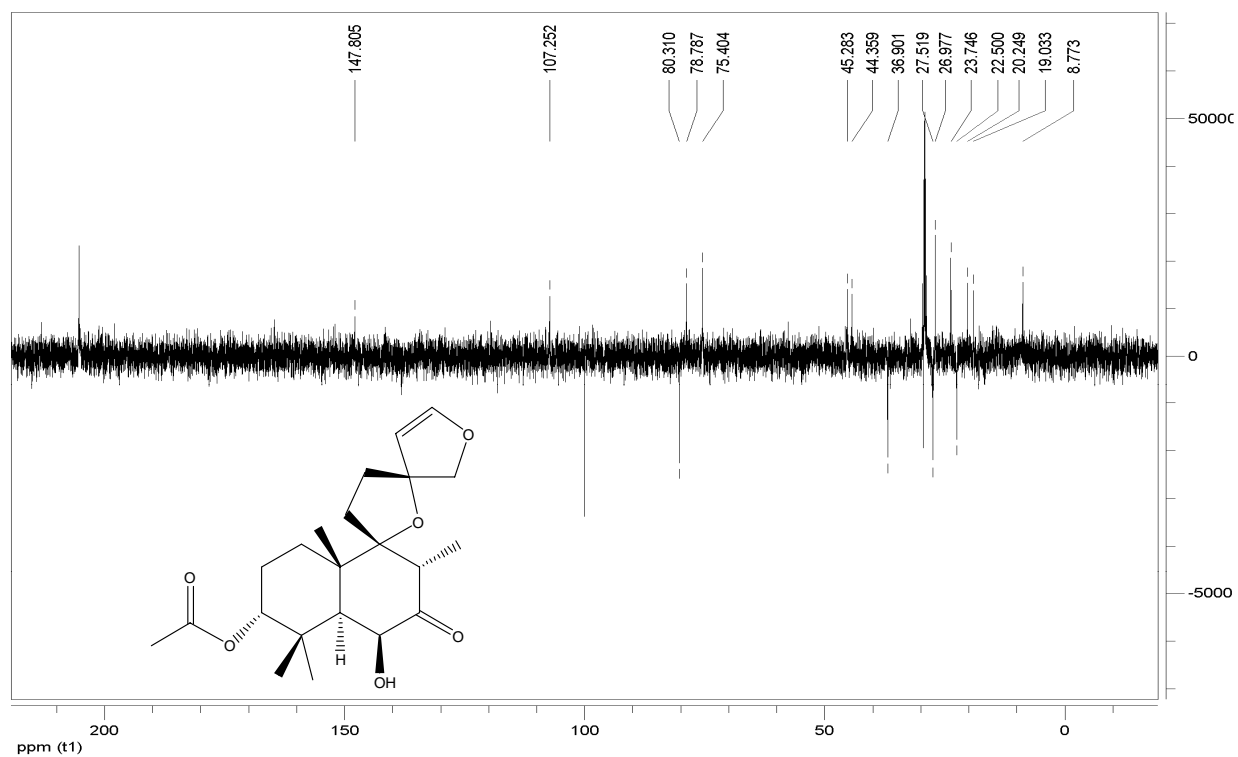

S10. HMQC spectrum of the new compound **2**

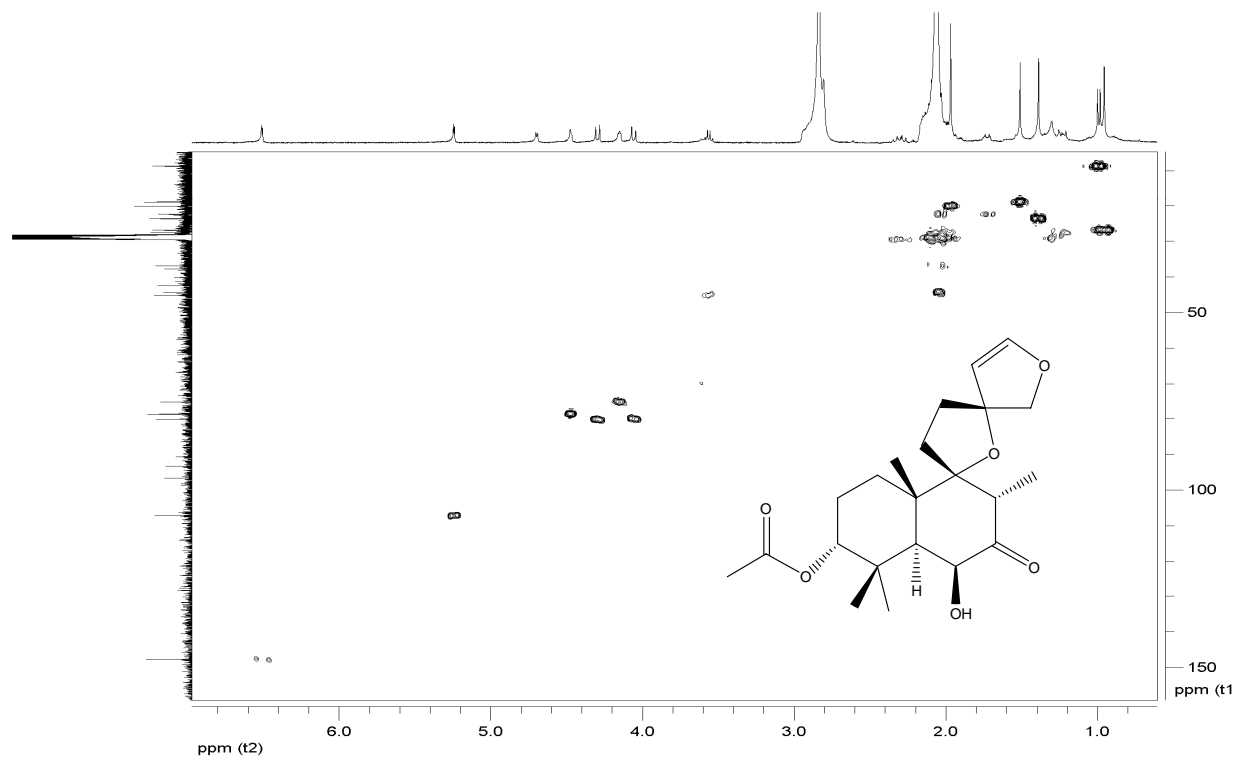

S11. HMBC spectrum of the new compound **2**

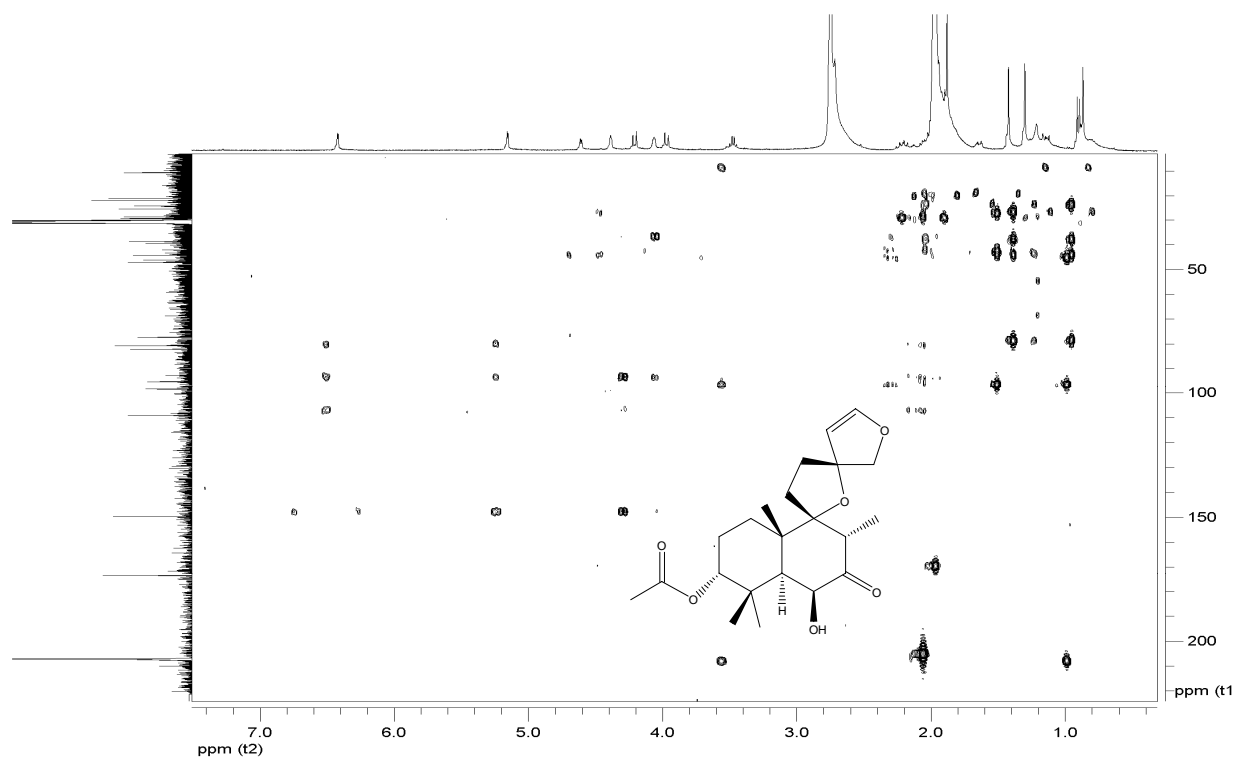

S12. NOESY spectrum of the new compound **2**

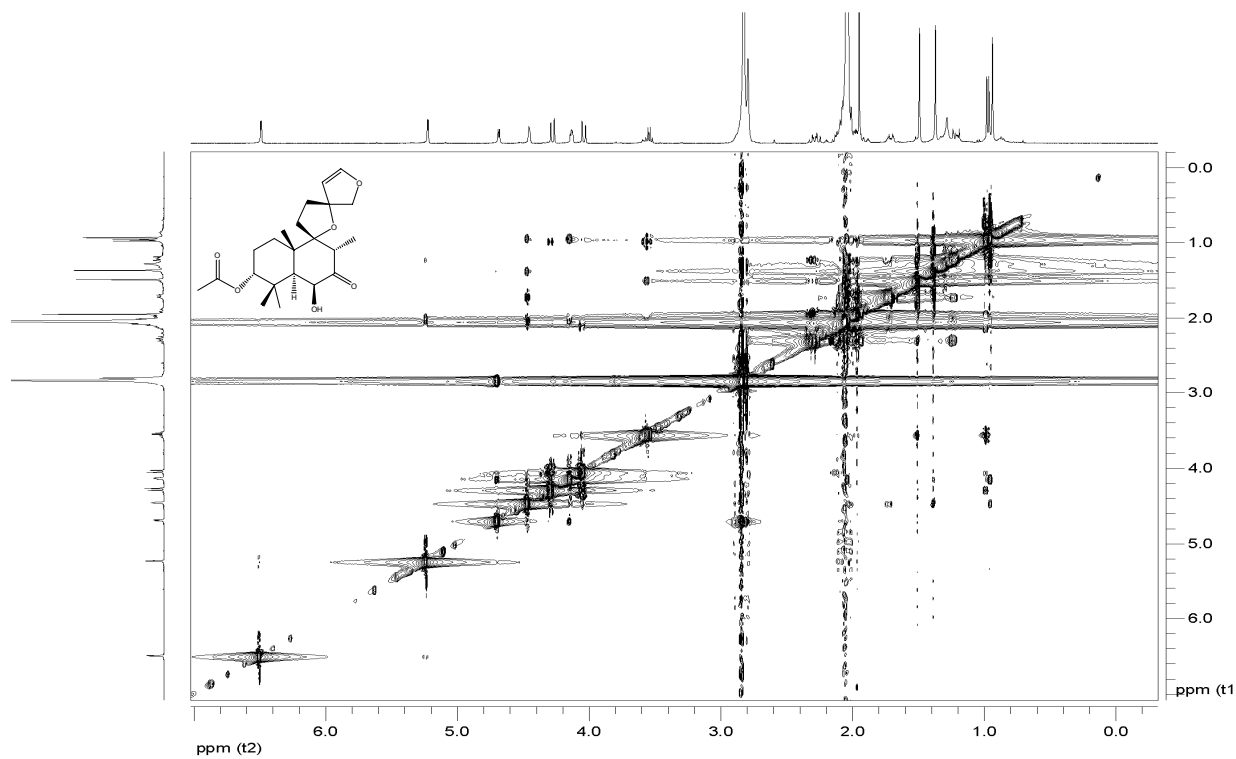



S13.  $^1\text{H}$  NMR (400 MHz, acetone- $d_6$ ) spectrum of the new compound **3**

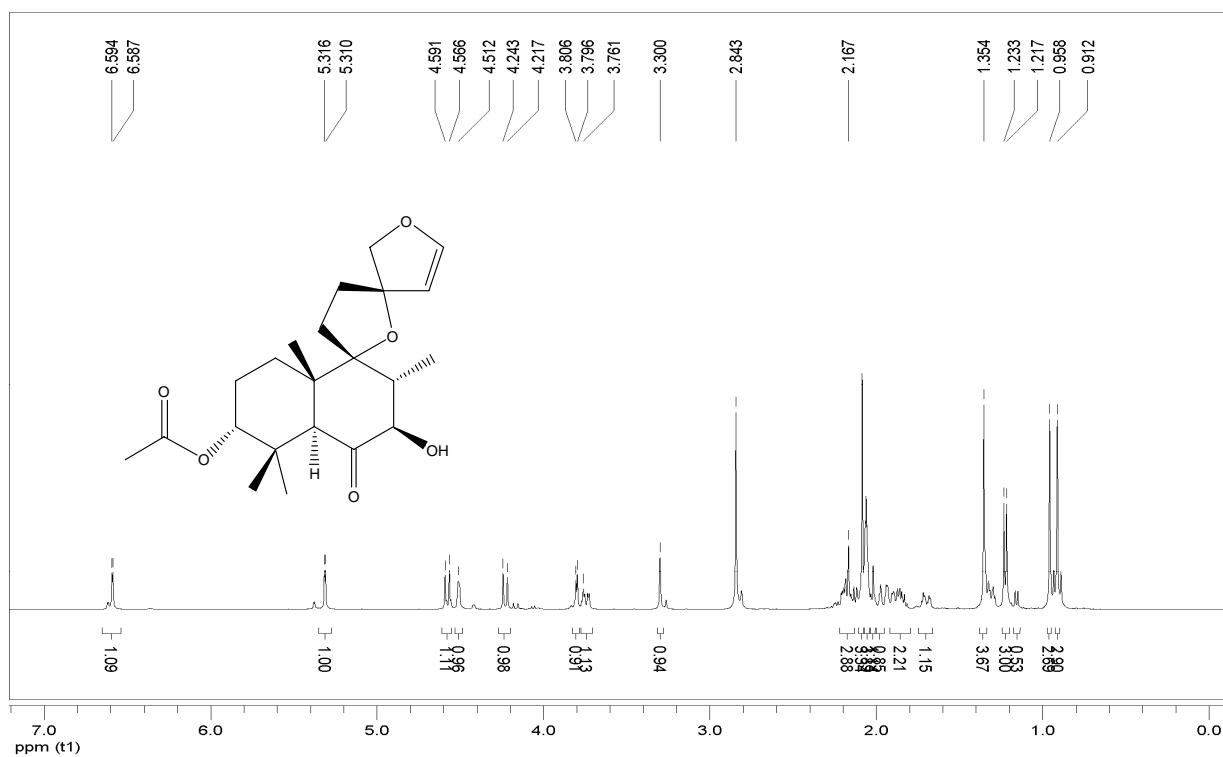

S14.  $^{13}\text{C}$  NMR (100 MHz, acetone- $d_6$ ) spectrum of the new compound **3**

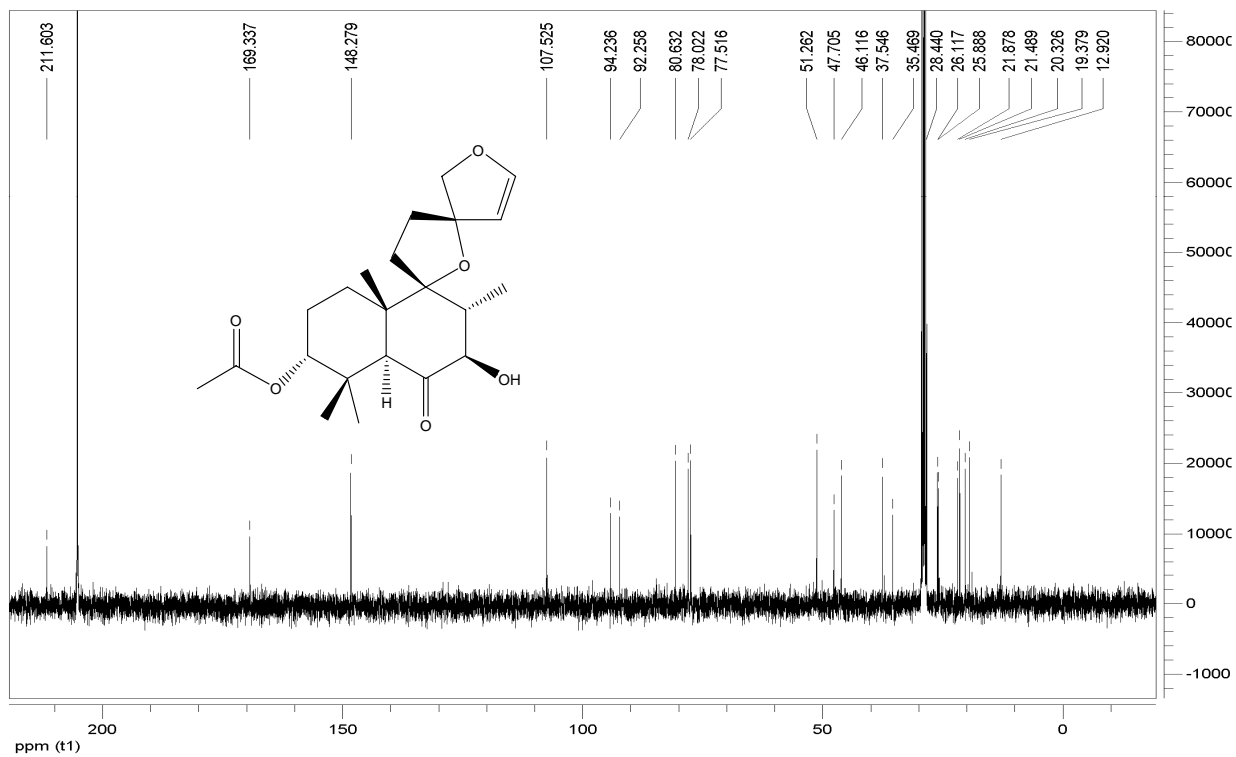

S15. DEPT 135 spectrum of the new compound **3**

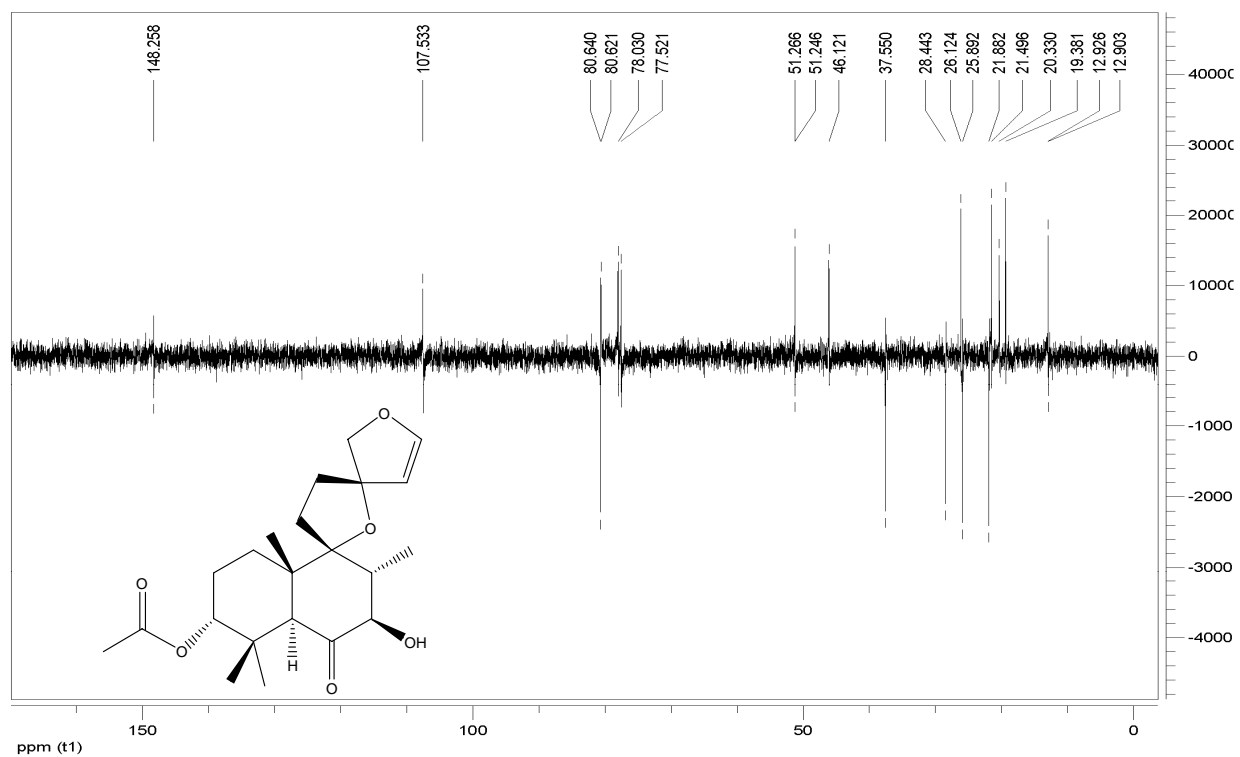

S16. HMQC spectrum of the new compound **3**

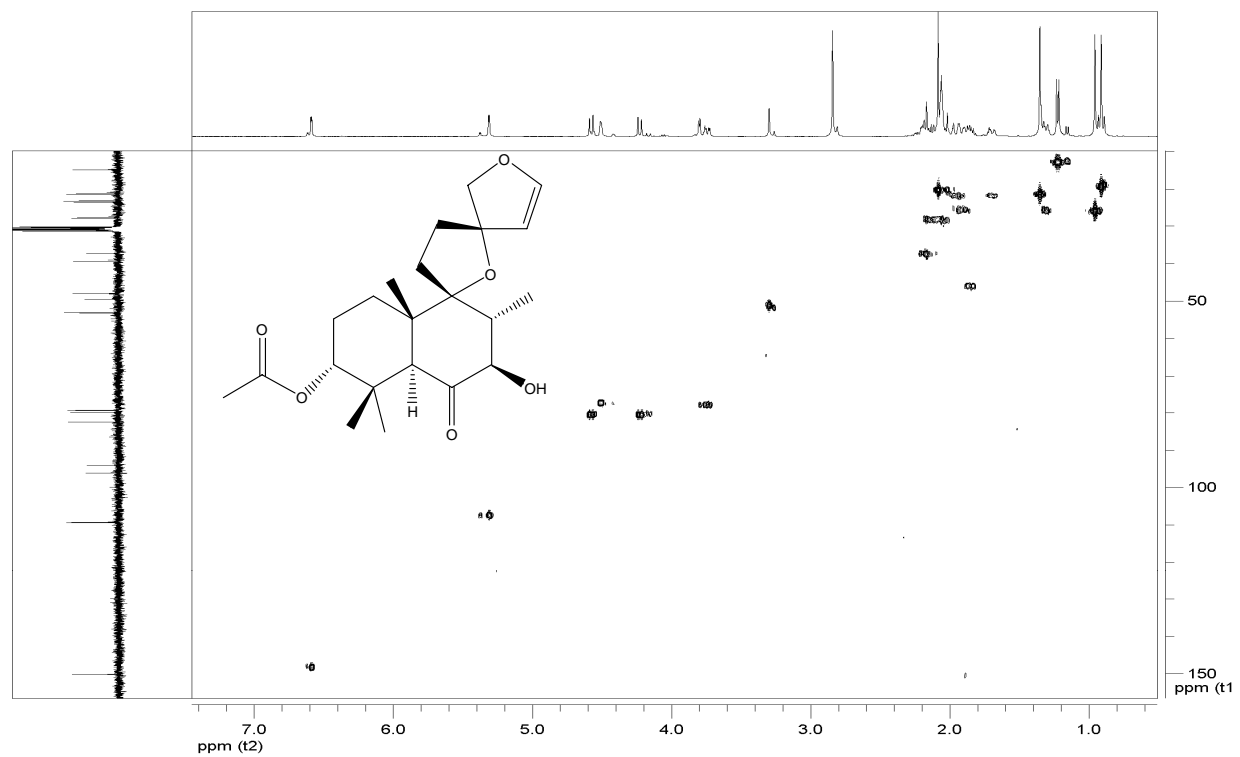

S17. HMBC spectrum of the new compound **3**

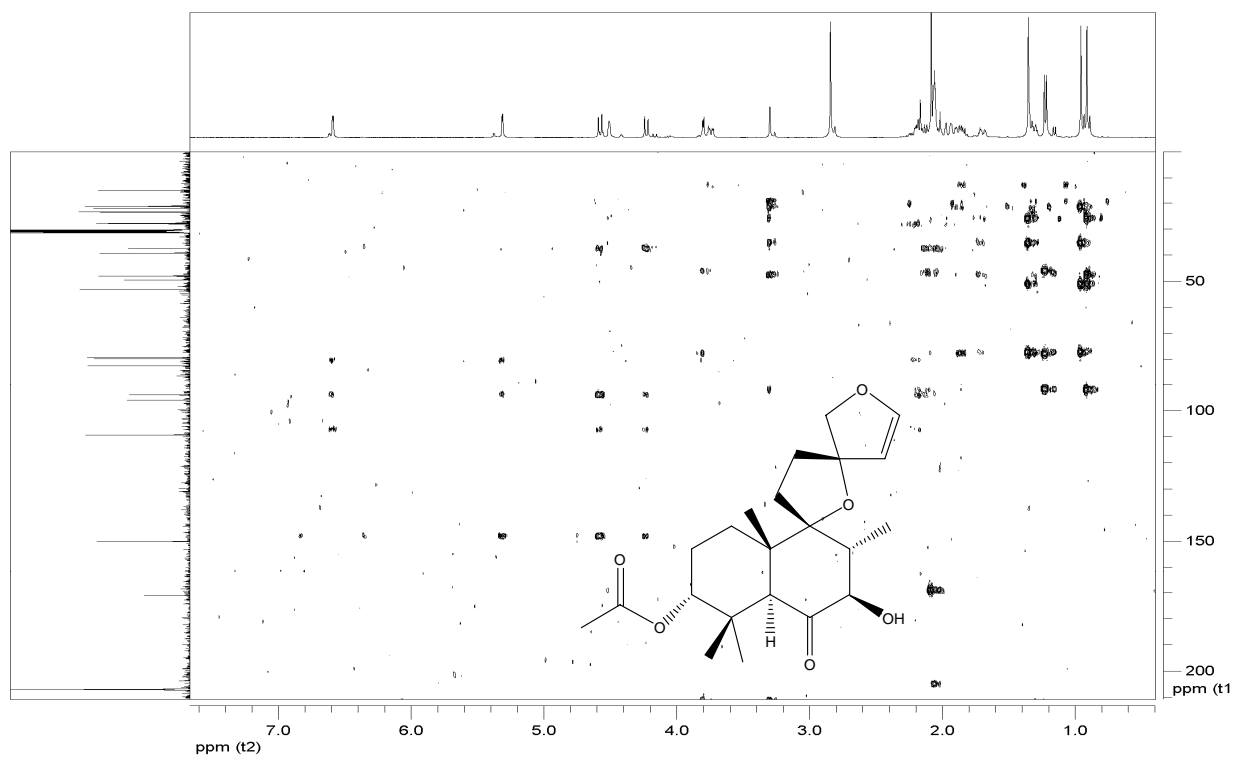

S18. NOESY spectrum of the new compound **3**

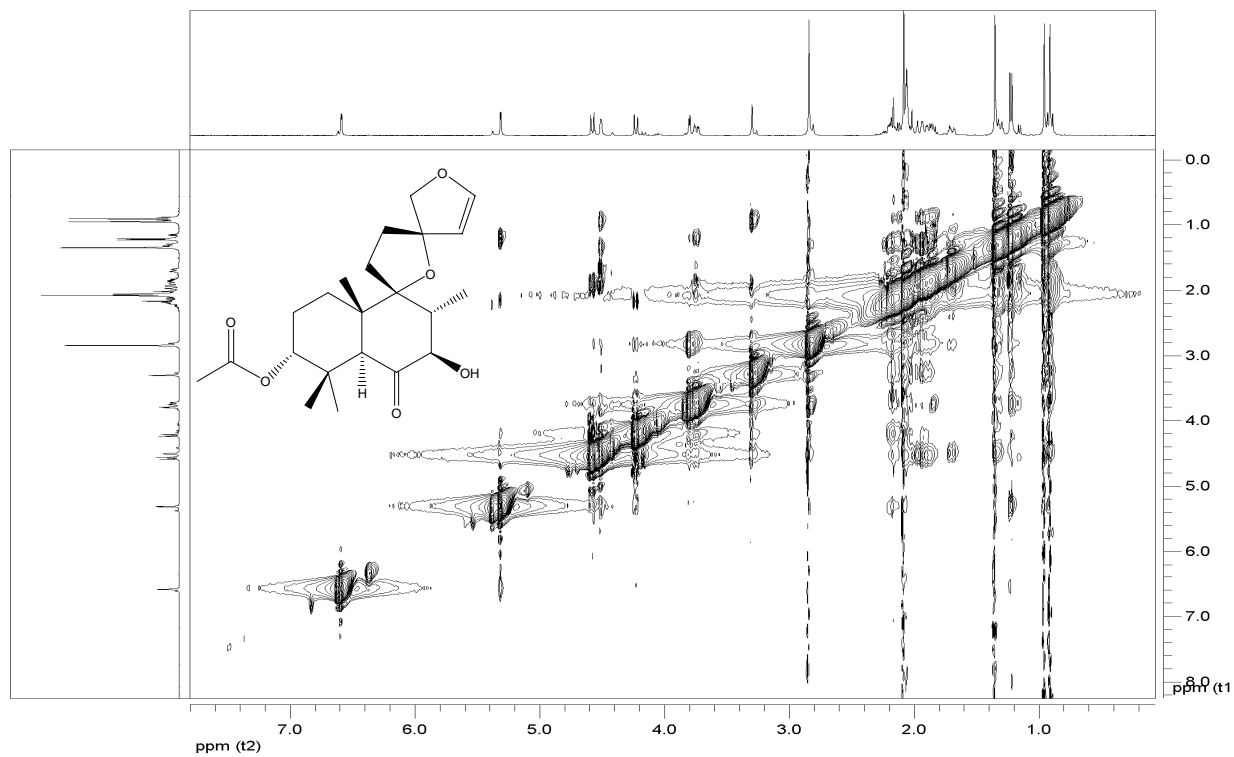



S21. DEPT 135 spectrum of the new compound **4**

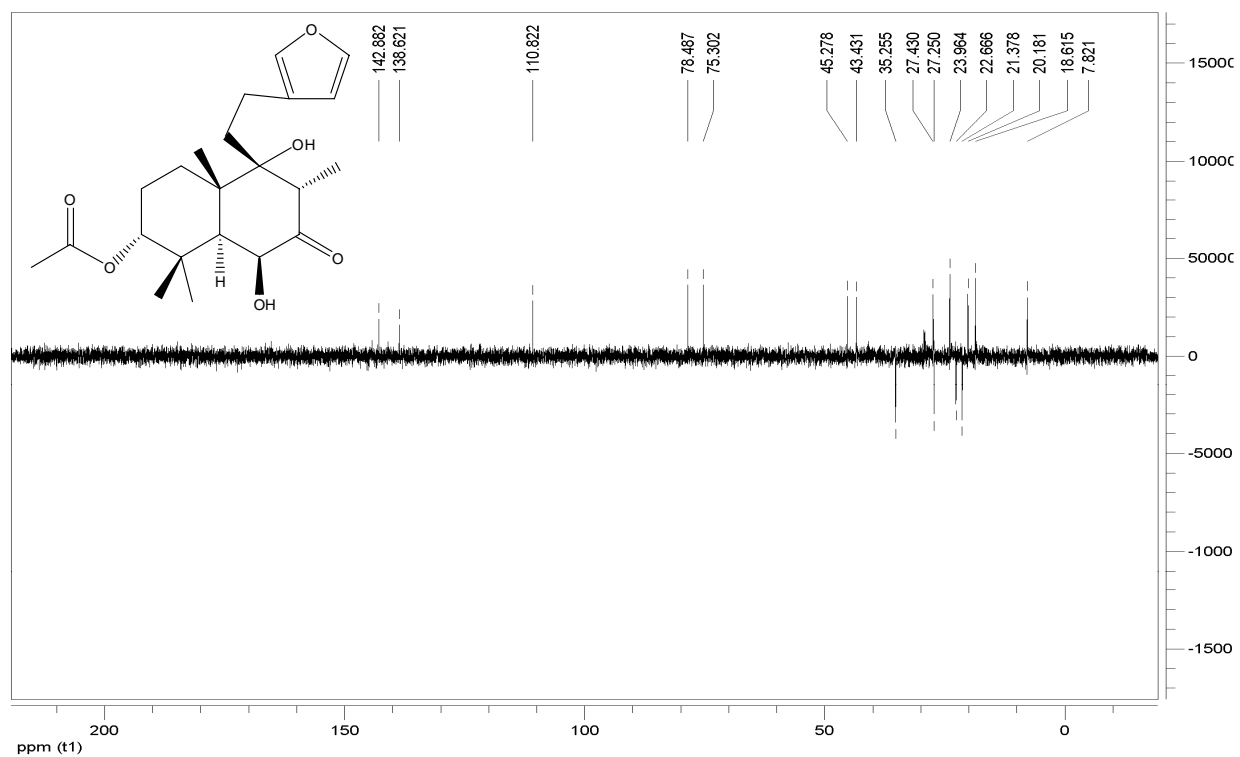

S22. HMQC spectrum of the new compound **4**

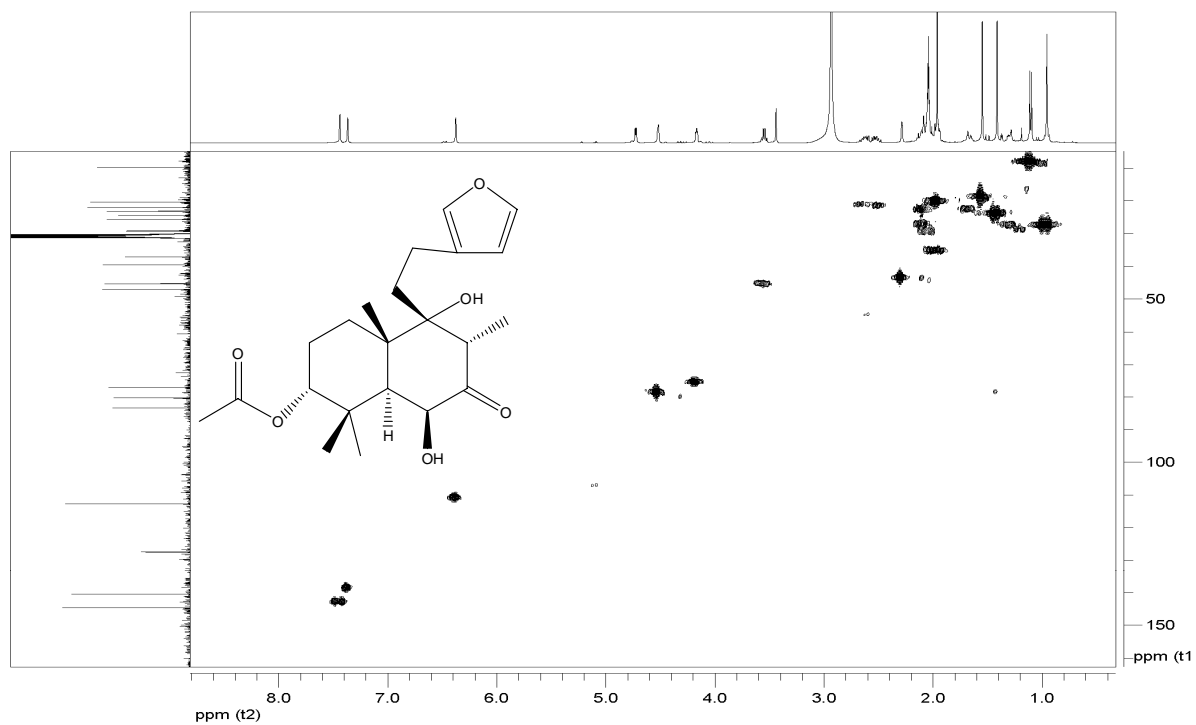

S23. HMBC spectrum of the new compound **4**

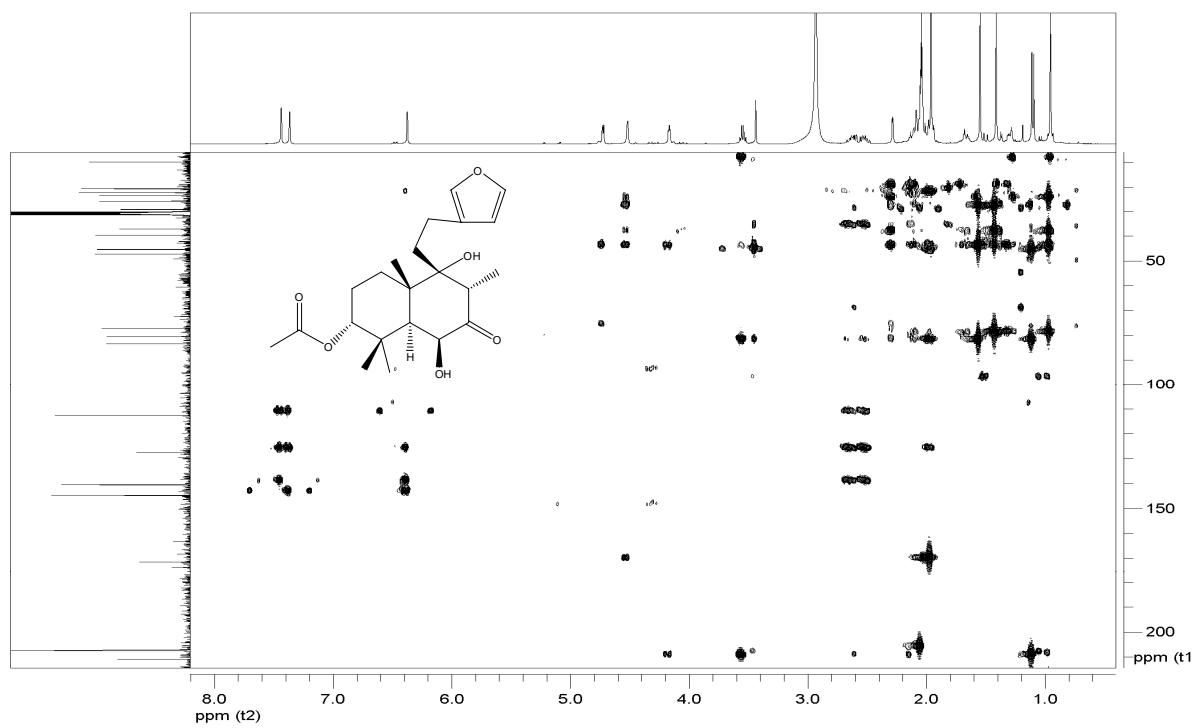

S24. NOESY spectrum of the new compound **4**

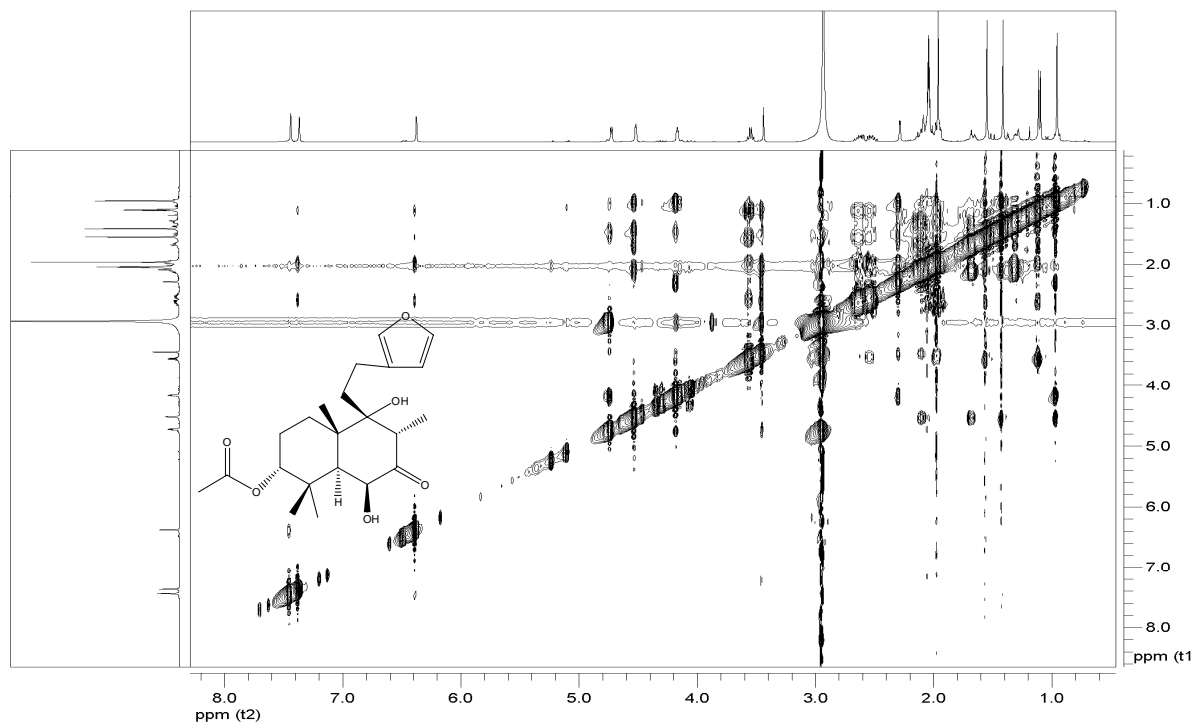

S25.  $^1\text{H}$  NMR (400 MHz,  $\text{DMSO-}d_6$ ) spectrum of the new compound **5/6**

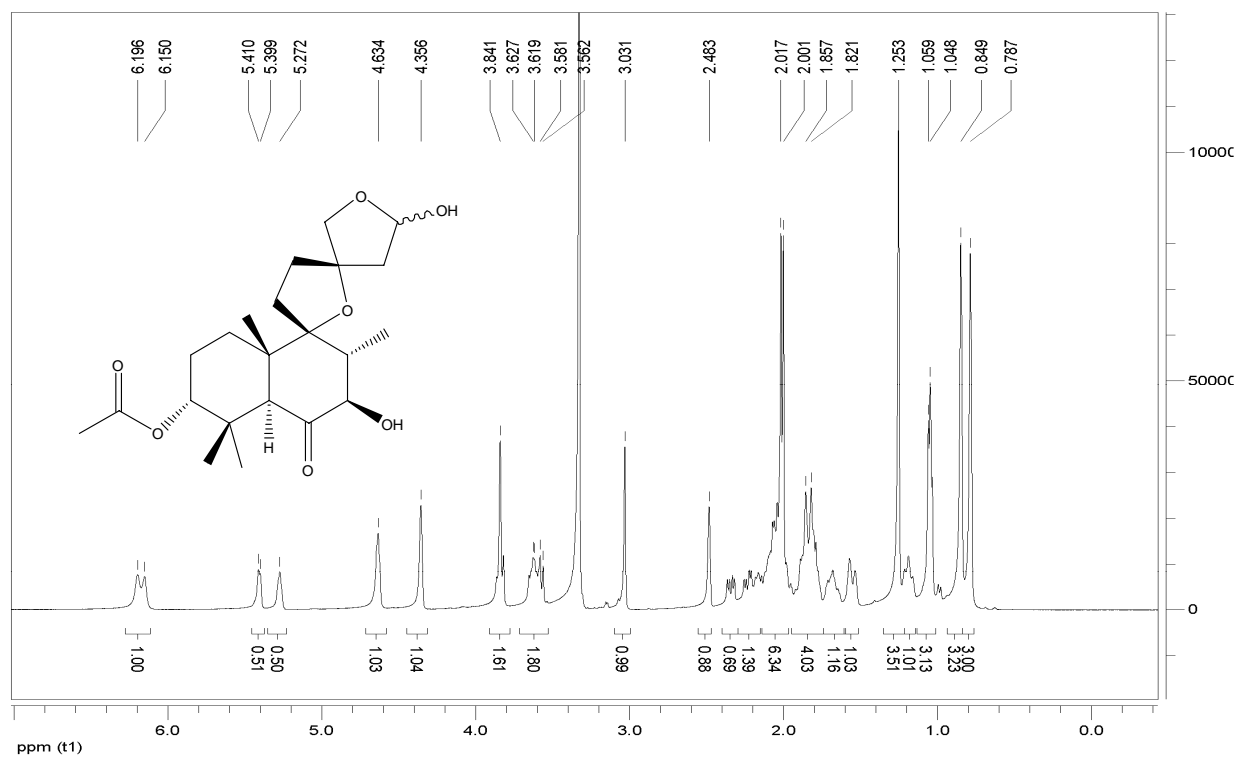

S26.  $^{13}\text{C}$  NMR (100 MHz,  $\text{DMSO-}d_6$ ) spectrum of the new compound **5/6**

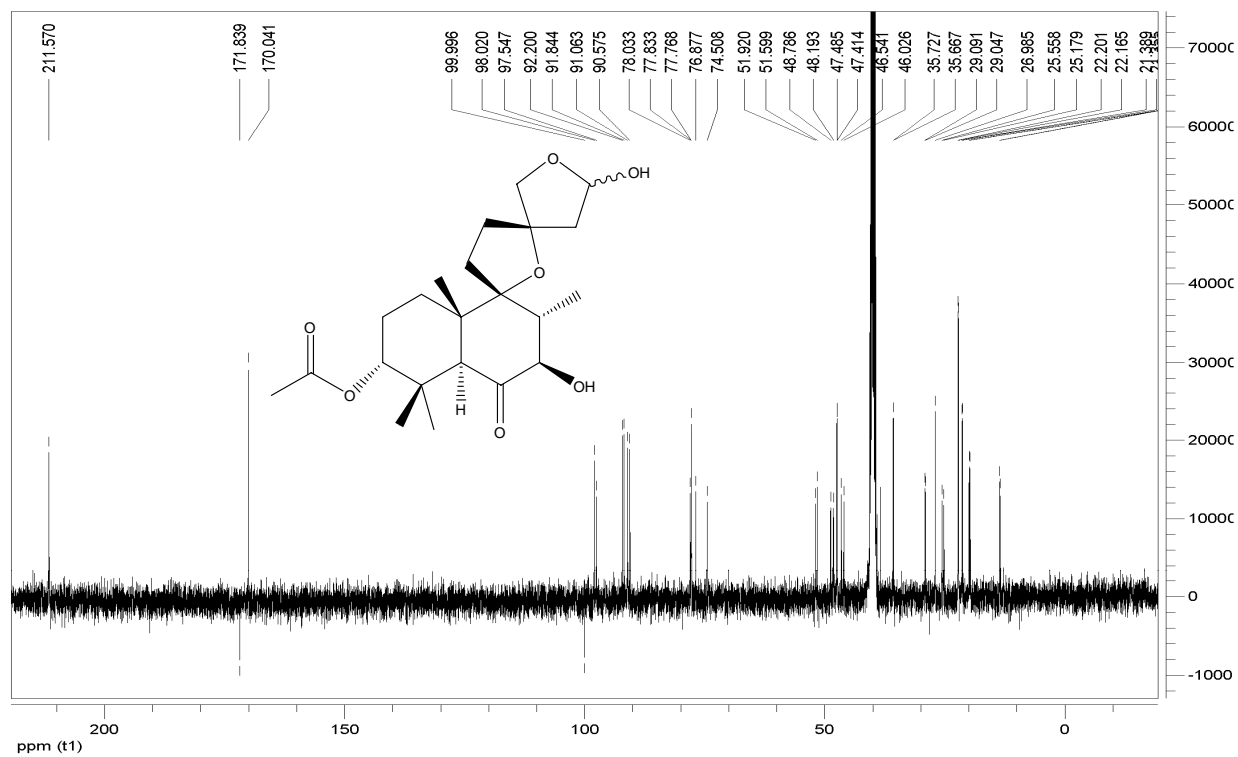

S27. DEPT 135 spectrum of the new compound **5/6**

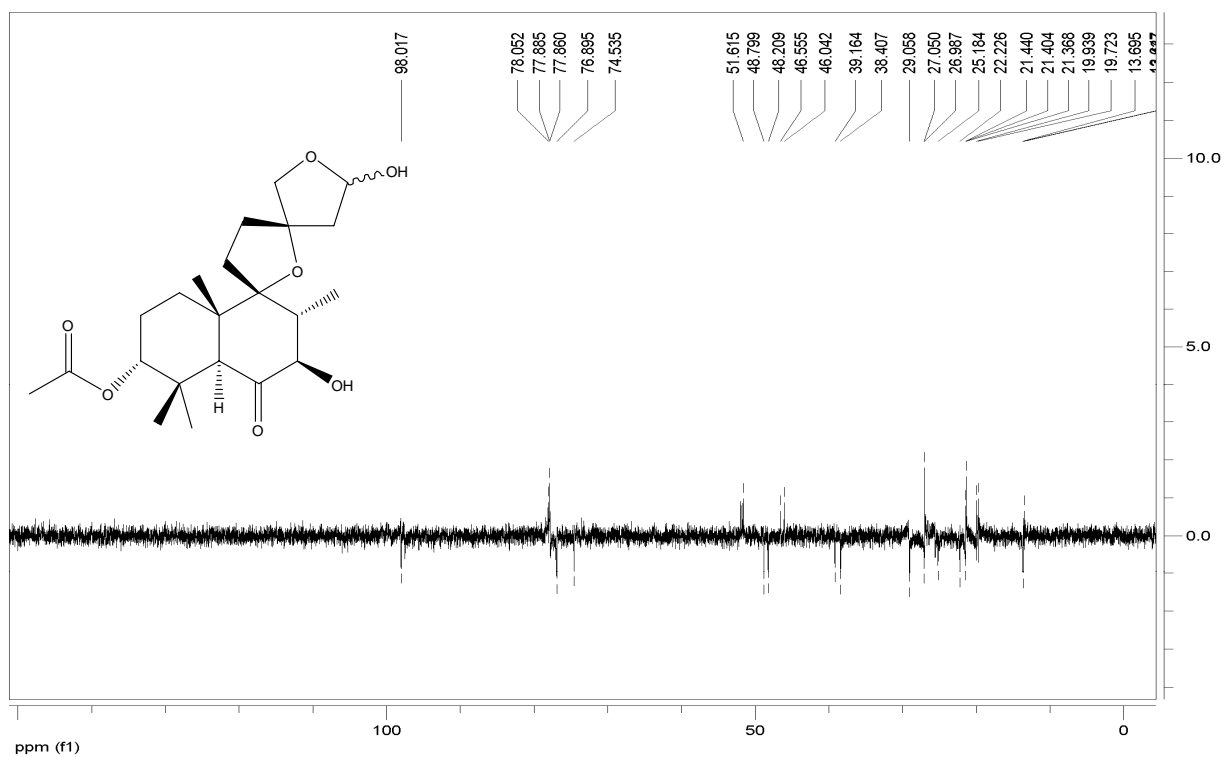

S28. HMQC spectrum of the new compound **5/6**

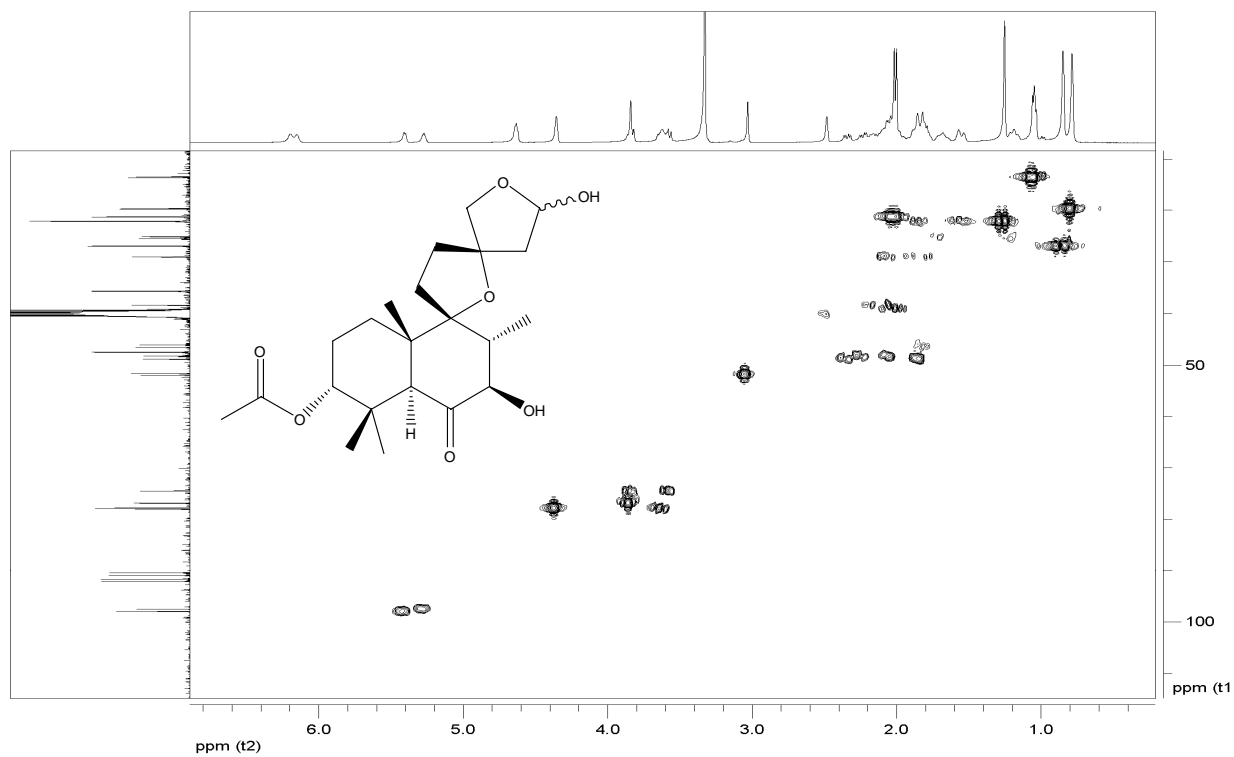



S29. HMBC spectrum of the new compound **5/6**

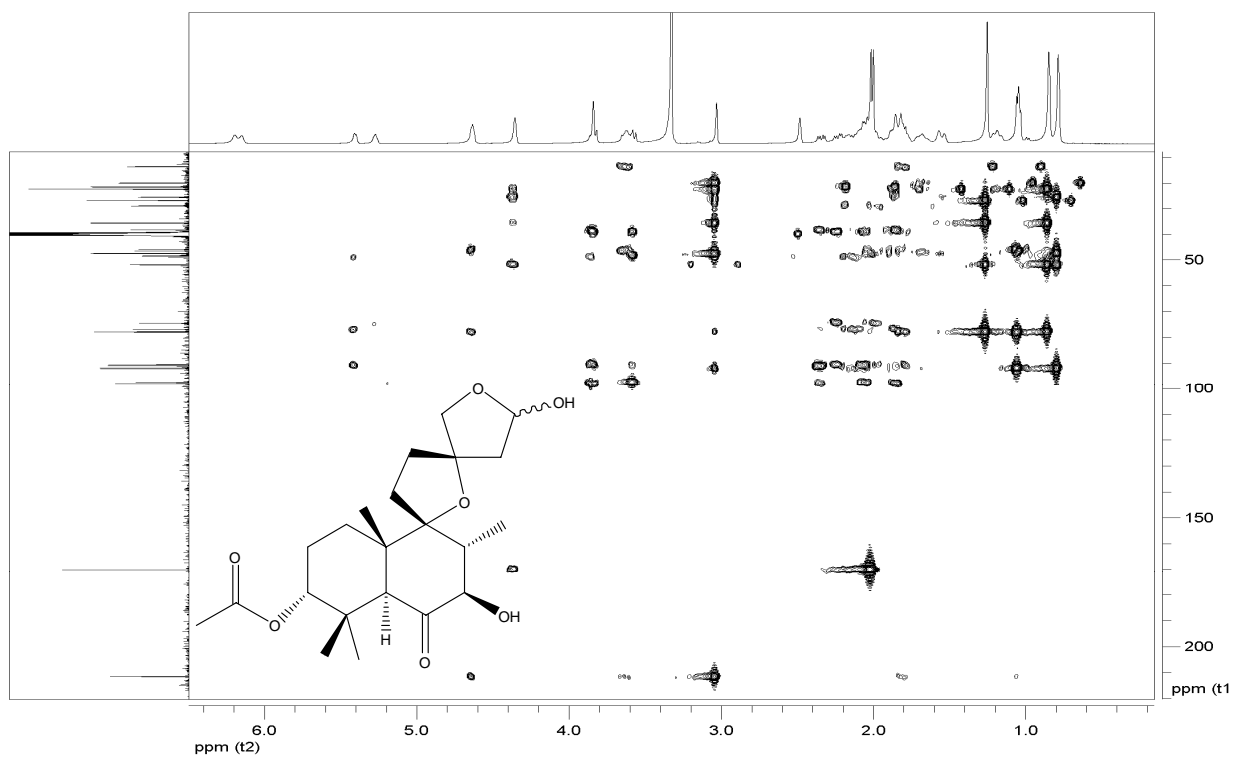

S30. NOESY spectrum of the new compound **5/6**

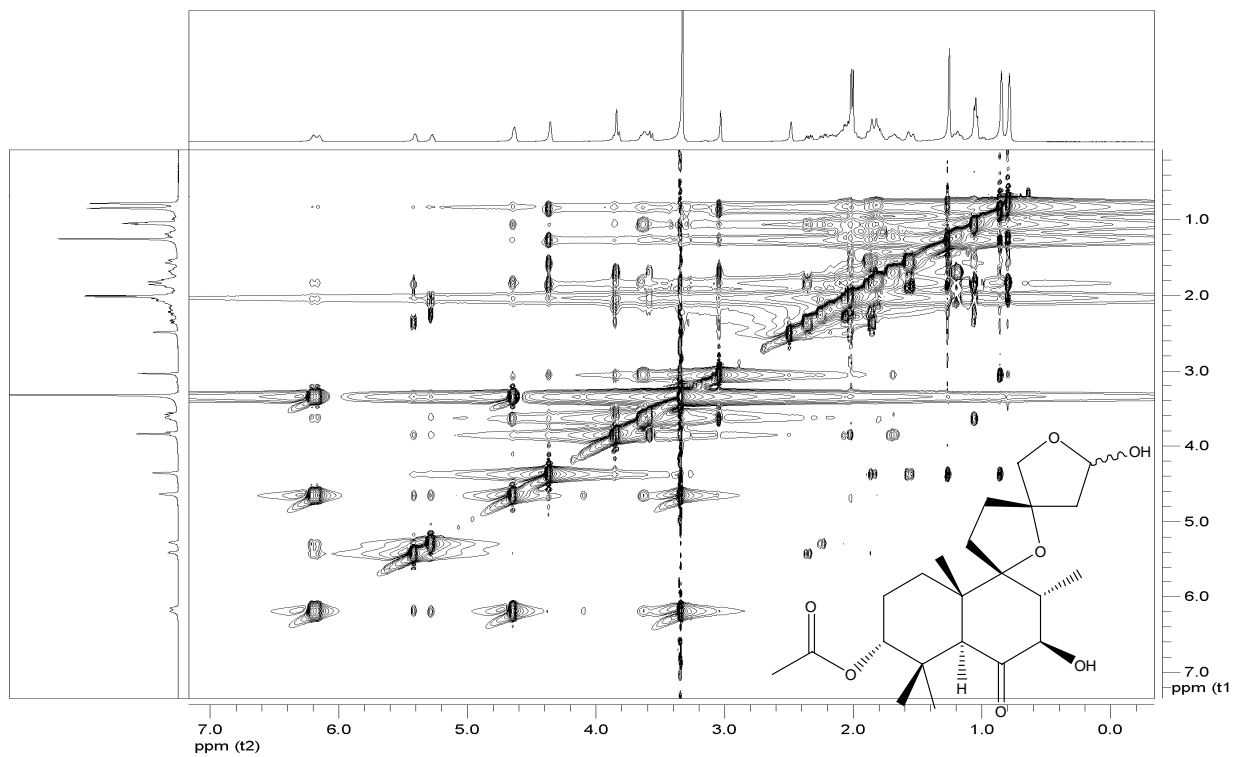

Supplement: NIHMS278861-supplement-1_si_001.pdf [file NIHMS278861-supplement-1_si_001.pdf]
